# Supplementary material for: Construction and characterization of stable multi-species biofilms formed by nine core gut bacteria on wheat fiber
Source: Royal Society of Chemistry journal article supplement (doi:10.1039/d4fo01294a), 2024-01-01
Supplement: d4fo01294a1.pdf [file d4fo01294a1.pdf]

Supplementary Information for:

## Construction and characterization of stable multi-species biofilm formed by nine core gut bacteria on wheat fiber

Ting Zhang,<sup>a,b</sup> Yue Xiao,<sup>a,b</sup> Hongchao Wang,<sup>a,b</sup> Jinlin Zhu,<sup>a,b</sup> Wenwei Lu,<sup>a,b,c,d</sup> Hao Zhang,<sup>a,b,d</sup>  
and Wei Chen<sup>\*a,b,d</sup>

<sup>a</sup> State Key Laboratory of Food Science and Technology, Jiangnan University, Wuxi, 214122, China

<sup>b</sup> School of Food Science and Technology, Jiangnan University, Wuxi, 214122, China

<sup>c</sup> International Joint Research Laboratory for Pharmabiotics & Antibiotic Resistance, Jiangnan University, Wuxi, 214122, China

<sup>d</sup> National Engineering Research Center for Functional Food, Jiangnan University, Wuxi, 214122, China

Corresponding author: chenwei66@jiangnan.edu.cn

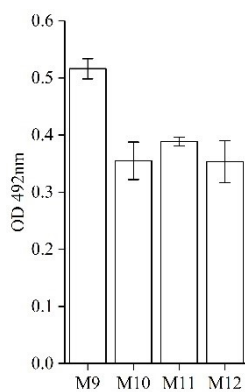

Fig. S1. The biofilm formation ability detected by XTT reduction assay at the absorbance value at 492 nm. M9: *B. ovatus*, *P. distasonis*, *B. uniformis*, *B. cellulosilyticus*, *E. coli*, *B. fragilis*, *P. dorei*, *B. stercoris*, and *B. longum*; M10: *B. ovatus*, *P. distasonis*, *B. uniformis*, *B. cellulosilyticus*, *E. coli*, *B. fragilis*, *P. dorei*, *B. stercoris*, *B. longum*, and *B. xylanisolvans*; M11: *B. ovatus*, *P. distasonis*, *B. uniformis*, *B. cellulosilyticus*, *E. coli*, *B. fragilis*, *P. dorei*, *B. stercoris*, *B. longum*, *B. xylanisolvans*, and *P. merdae*; M12: *B. ovatus*, *P. distasonis*, *B. uniformis*, *B. cellulosilyticus*, *E. coli*, *B. fragilis*, *P. dorei*, *B. stercoris*, *B. longum*, *B. xylanisolvans*, *R. torques*, and *F. prausnitzii*.

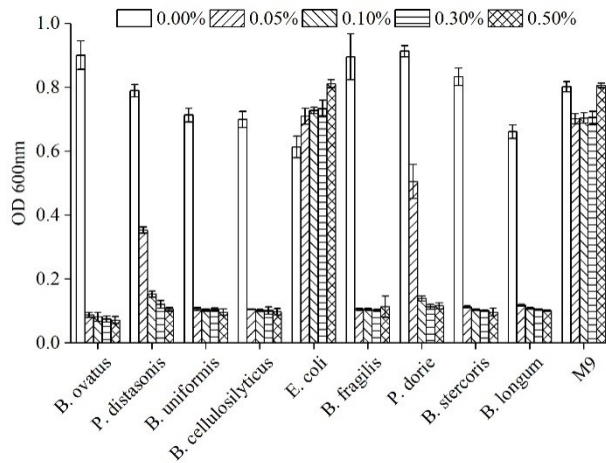

Fig. S2. The absorbance values at OD 600nm of mono and multi-species biofilms with different bile salt concentrations (0.00%, 0.05%, 0.1%, 0.3%, and 0.5%).

Table S1. The information of 18 species core gut bacteria.

| Strain name                                      | Abbreviation        | Source                                                                | Characteristic            |
|--------------------------------------------------|---------------------|-----------------------------------------------------------------------|---------------------------|
| <i>Bacteroides ovatus</i> CCFM1342               | B. ovatus           | Culture Collection of Food Microorganisms (CCFM), Jiangnan University | hemicellulose degradation |
| <i>Parabacteroides distasonis</i> CCFM1377       | P. distasonis       | CCFM, Jiangnan University                                             | hemicellulose degradation |
| <i>Bacteroides uniformis</i> CCFM1358            | B. uniformis        | CCFM, Jiangnan University                                             | hemicellulose degradation |
| <i>Bacteroides cellulosilyticus</i> FSDTAELIBH15 | B. cellulosilyticus | CCFM, Jiangnan University                                             | cellulose degradation     |
| <i>Bacteroides thetaiotaomicron</i> FTJS1K7      | B. thetaiotaomicron | CCFM, Jiangnan University                                             | hemicellulose degradation |
| <i>Bacteroides vulgatus</i> FSDTAHCMXY14         | B. vulgatus         | CCFM, Jiangnan University                                             | hemicellulose degradation |
| <i>Escherichia coli</i> CCFM1378                 | E. coli             | CCFM, Jiangnan University                                             | -                         |
| <i>Bacteroides fragilis</i> FSDTAHCK_B8          | B. fragilis         | CCFM, Jiangnan University                                             | -                         |
| <i>Phocaeicola dorei</i> FSDLZ62K4               | P. dorei            | CCFM, Jiangnan University                                             | -                         |
| <i>Bacteroides stercoris</i> FFJLY21K3           | B. stercoris        | CCFM, Jiangnan University                                             | -                         |
| <i>Bifidobacterium longum</i> FBJCY2M11          | B. longum           | CCFM, Jiangnan University                                             | -                         |
| <i>Bacteroides caccae</i> FNMHLBE15K4            | B. caccae           | CCFM, Jiangnan University                                             | -                         |
| <i>Bacteroides xylanisolvens</i> FGDLZ48K3       | B. xylanisolvens    | CCFM, Jiangnan University                                             | -                         |
| <i>Streptococcus salivarius</i> K12              | S. salivarius       | CCFM, Jiangnan University                                             | -                         |
| <i>Parabacteroides merdae</i> FSDTAELIBH14       | P. merdae           | CCFM, Jiangnan University                                             | -                         |
| <i>Alistipes onderdonkii</i> DSM 19147           | A. onderdonkii      | DSMZ                                                                  | -                         |
| <i>Ruminococcus torques</i> ATCC 27756           | R. torques          | ATCC                                                                  | -                         |
| <i>Faecalibacterium prausnitzii</i> A2-165       | F. prausnitzii      | DSMZ                                                                  | -                         |

Table S2. Details of modified YCFA medium (1L)

| Formulation                                     | Content | Formulation                | Content |
|-------------------------------------------------|---------|----------------------------|---------|
| Casein peptone                                  | 10 g    | Cellobiose                 | 2g      |
| Tryptone                                        | 10 g    | Maltose                    | 2 g     |
| Yeast extract                                   | 5 g     | Biotin                     | 0.01 mg |
| Sodium acetate                                  | 5 g     | Vitamin B12                | 0.01 mg |
| Lactose-H <sub>2</sub> O                        | 5 g     | p-aminobenzoic acid        | 0.03 mg |
| NaHCO <sub>3</sub>                              | 4 g     | Folic acid                 | 0.05 mg |
| (NH <sub>4</sub> ) <sub>2</sub> SO <sub>4</sub> | 1.8 g   | Pyridoxine-HCl             | 0.15 mg |
| KH <sub>2</sub> PO <sub>4</sub>                 | 0.45 g  | Vitamin B1                 | 0.05 mg |
| NaCl                                            | 0.9 g   | Riboflavin                 | 0.05 mg |
| MgSO <sub>4</sub> × 7 H <sub>2</sub> O          | 0.045 g | D-Ca-pantothenate          | 5 mg    |
| CaCl <sub>2</sub>                               | 0.09 g  | Hemin chloride             | 1%      |
| L-Cysteine-HCl                                  | 1.445 g | Clarify bovine rumen fluid | 0.5%    |

|         |    |  |  |
|---------|----|--|--|
| Glucose | 2g |  |  |
|---------|----|--|--|

Table S3. Details of strain-specific primers.

| Species                    | Primer name           | Sequence (5'-3')         | Amplicon size (bp) |
|----------------------------|-----------------------|--------------------------|--------------------|
| <i>B. ovatus</i>           | B. ovatus-F           | GGGCCTATTATCGCAACCGA     | 114                |
|                            | B. ovatus-R           | AGGTGCATACGTAGACGGAC     |                    |
| <i>P. distasonis</i>       | P. distasonis-F       | TGCCTATCAGAGGGGGATAAC    | 78                 |
|                            | P. distasonis-R       | GCAAATATTCCCATGCGGGAT    |                    |
| <i>B. uniformis</i>        | B. uniformis-F        | GGAATTCCCGAAAAGACCTTCCG  | 99                 |
|                            | B. uniformis-R        | GTAGGCATTGCTGTCTTTGCACAT |                    |
| <i>B. cellulosilyticus</i> | B. cellulosilyticus-F | AGCAGGCGGAATTCGATAAG     | 96                 |
|                            | B. cellulosilyticus-R | GTGTACAGTGCCAGGCATAA     |                    |
| <i>E. coli</i>             | E. coli-F             | CAACGAACTGAACTGGCAGA     | 121                |
|                            | E. coli-R             | CATTACGCTGCGATGGAT       |                    |
| <i>B. fragilis</i>         | B. fragilis-F         | TCAGGAAGAAAGCTTGCT       | 163                |
|                            | B. fragilis-R         | CATCCTTTACCGAATCCT       |                    |
| <i>P. dorei</i>            | P. dorei-F            | AAGCGGCTTCAAGAAACAGG     | 100                |
|                            | P. dorei-R            | GTGCCCTTTACCTTGGGAAC     |                    |
| <i>B. stercoris</i>        | B. stercoris-F        | TGGGACAGGCATCCATCAAC     | 211                |
|                            | B. stercoris-R        | CCGAGCGACAGTACCATAACC    |                    |
| <i>B. longum</i>           | B. longum-F           | ATCCGTCCGACCCAGACC       | 123                |
|                            | B. longum-R           | CTCGACATCCTCACGGCC       |                    |

Table S4. The group information of mono-bacterium and mixed strains.

| No. group | Mono and multi-species                                                                                                                       | Label       |
|-----------|----------------------------------------------------------------------------------------------------------------------------------------------|-------------|
| 1         | <i>B. ovatus</i>                                                                                                                             | A           |
| 2         | <i>P. distasonis</i>                                                                                                                         | B           |
| 3         | <i>B. uniformis</i>                                                                                                                          | C           |
| 4         | <i>B. cellulosilyticus</i>                                                                                                                   | D           |
| 5         | <i>B. thetaiotaomicron</i>                                                                                                                   | E           |
| 6         | <i>B. vulgatus</i>                                                                                                                           | F           |
| 7         | <i>B. ovatus</i> + <i>P. distasonis</i>                                                                                                      | A+B         |
| 8         | <i>B. ovatus</i> + <i>B. uniformis</i>                                                                                                       | A+C         |
| 9         | <i>B. ovatus</i> + <i>B. cellulosilyticus</i>                                                                                                | A+D         |
| 10        | <i>B. ovatus</i> + <i>B. thetaiotaomicron</i>                                                                                                | A+E         |
| 11        | <i>B. ovatus</i> + <i>B. vulgatus</i>                                                                                                        | A+F         |
| 12        | <i>P. distasonis</i> + <i>B. uniformis</i>                                                                                                   | B+C         |
| 13        | <i>P. distasonis</i> + <i>B. cellulosilyticus</i>                                                                                            | B+D         |
| 14        | <i>P. distasonis</i> + <i>B. thetaiotaomicron</i>                                                                                            | B+E         |
| 15        | <i>P. distasonis</i> + <i>B. vulgatus</i>                                                                                                    | B+F         |
| 16        | <i>B. uniformis</i> + <i>B. cellulosilyticus</i>                                                                                             | C+D         |
| 17        | <i>B. uniformis</i> + <i>B. thetaiotaomicron</i>                                                                                             | C+E         |
| 18        | <i>B. uniformis</i> + <i>B. vulgatus</i>                                                                                                     | C+F         |
| 19        | <i>B. cellulosilyticus</i> + <i>B. thetaiotaomicron</i>                                                                                      | D+E         |
| 20        | <i>B. cellulosilyticus</i> + <i>B. vulgatus</i>                                                                                              | D+F         |
| 21        | <i>B. thetaiotaomicron</i> + <i>B. vulgatus</i>                                                                                              | E+F         |
| 22        | <i>B. ovatus</i> + <i>P. distasonis</i> + <i>B. uniformis</i>                                                                                | A+B+C       |
| 23        | <i>B. ovatus</i> + <i>P. distasonis</i> + <i>B. cellulosilyticus</i>                                                                         | A+B+D       |
| 24        | <i>B. ovatus</i> + <i>P. distasonis</i> + <i>B. thetaiotaomicron</i>                                                                         | A+B+E       |
| 25        | <i>B. ovatus</i> + <i>P. distasonis</i> + <i>B. uniformis</i> + <i>B. cellulosilyticus</i>                                                   | A+B+C+D     |
| 26        | <i>B. ovatus</i> + <i>P. distasonis</i> + <i>B. uniformis</i> + <i>B. thetaiotaomicron</i>                                                   | A+B+C+E     |
| 27        | <i>B. ovatus</i> + <i>P. distasonis</i> + <i>B. thetaiotaomicron</i> + <i>B. cellulosilyticus</i>                                            | A+B+D+E     |
| 28        | <i>B. ovatus</i> + <i>P. distasonis</i> + <i>B. uniformis</i> + <i>B. cellulosilyticus</i> + <i>B. thetaiotaomicron</i>                      | A+B+C+D+E   |
| 29        | <i>B. ovatus</i> + <i>P. distasonis</i> + <i>B. uniformis</i> + <i>B. cellulosilyticus</i> + <i>B. vulgatus</i>                              | A+B+C+D+F   |
| 30        | <i>B. ovatus</i> + <i>P. distasonis</i> + <i>B. uniformis</i> + <i>B. cellulosilyticus</i> + <i>B. thetaiotaomicron</i> + <i>B. vulgatus</i> | A+B+C+D+E+F |

Table S5. The qPCR standard curves of the 9 bacteria.

| Strains              | Standard curves       | R <sup>2</sup>          |
|----------------------|-----------------------|-------------------------|
| <i>B. ovatus</i>     | y = -3.2165x + 46.878 | R <sup>2</sup> = 0.9996 |
| <i>P. distasonis</i> | y = -3.1102x + 52.574 | R <sup>2</sup> = 0.9997 |
| <i>B. uniformis</i>  | y = -3.1237x + 48.786 | R <sup>2</sup> = 0.9994 |

|                            |                         |                |
|----------------------------|-------------------------|----------------|
| <i>B. cellulosilyticus</i> | $y = -3.3114x + 50.962$ | $R^2 = 0.9998$ |
| <i>E. coli</i>             | $y = -3.132x + 53.105$  | $R^2 = 0.9985$ |
| <i>B. fragilis</i>         | $y = -3.3471x + 51.198$ | $R^2 = 0.9996$ |
| <i>P. dorie</i>            | $y = -3.1504x + 46.351$ | $R^2 = 0.9996$ |
| <i>B. stercoris</i>        | $y = -3.3236x + 45.784$ | $R^2 = 0.9993$ |
| <i>B. longum</i>           | $y = -2.8275x + 54.028$ | $R^2 = 0.9962$ |
